# Supplementary material
Source: publisher figshare collection journal article supplement (https://frontiersin.figshare.com/ndownloader/files/13635404)
Supplement: Supplementary file [file 13635404]

## *Supplementary Material*

### **Heterogeneous colistin-resistance phenotypes coexisting in *Stenotrophomonas maltophilia* isolates influence colistin susceptibility testing**

**Sònia Martínez-Servat, Daniel Yero, Pol Huedo, Roser Marquez, Gara Molina, Xavier Daura\* and Isidre Gibert\***

**\*Correspondence:** Corresponding Authors [Xavier.Daura@uab.cat](mailto:Xavier.Daura@uab.cat) and [Isidre.Gibert@uab.cat](mailto:Isidre.Gibert@uab.cat)

**Supplementary figures**

|                                                      | Colistin (mg/L) |     |     |     |     |     |     |             |     |     |      |  |
|------------------------------------------------------|-----------------|-----|-----|-----|-----|-----|-----|-------------|-----|-----|------|--|
|                                                      | Resistant       |     |     |     |     |     |     | Susceptible |     |     |      |  |
| Strains                                              | 256             | 128 | 64  | 32  | 16  | 8   | 4   | 2           | 1   | 0.5 | 0.25 |  |
| Strains showing heteroresistant response to colistin |                 |     |     |     |     |     |     |             |     |     |      |  |
| PU140                                                | ←MIC            |     |     |     |     |     |     |             |     |     |      |  |
| OUI41                                                | ←MIC            |     |     |     |     |     |     |             |     |     |      |  |
| PC187                                                | MIC             |     |     |     |     |     |     |             |     |     |      |  |
| PR45                                                 |                 | MIC |     |     |     |     |     |             |     |     |      |  |
| EV5520                                               |                 |     | MIC |     |     |     |     |             |     |     |      |  |
| PC257                                                |                 |     | MIC |     |     |     |     |             |     |     |      |  |
| PC255                                                |                 |     | MIC |     |     |     |     |             |     |     |      |  |
| P626                                                 |                 |     |     | MIC |     |     |     |             |     |     |      |  |
| M30                                                  |                 |     |     | MIC |     |     |     |             |     |     |      |  |
| PL20                                                 |                 |     |     | MIC |     |     |     |             |     |     |      |  |
| D457                                                 |                 |     |     | MIC |     |     |     |             |     |     |      |  |
| PG157                                                |                 |     |     | MIC |     |     |     |             |     |     |      |  |
| B5565                                                |                 |     |     | MIC |     |     |     |             |     |     |      |  |
| PR59                                                 |                 |     |     | MIC |     |     |     |             |     |     |      |  |
| PC232                                                |                 |     |     | MIC |     |     |     |             |     |     |      |  |
| K279a                                                |                 |     |     |     | MIC |     |     |             |     |     |      |  |
| E50                                                  |                 |     |     |     | MIC |     |     |             |     |     |      |  |
| PC314                                                |                 |     |     |     | MIC |     |     |             |     |     |      |  |
| B285                                                 |                 |     |     |     |     | MIC |     |             |     |     |      |  |
| UV74                                                 |                 |     |     |     |     | MIC |     |             |     |     |      |  |
| PC312                                                |                 |     |     |     |     | MIC |     |             |     |     |      |  |
| OL13                                                 |                 |     |     |     |     | MIC |     |             |     |     |      |  |
| PC274                                                |                 |     |     |     |     | MIC |     |             |     |     |      |  |
| S5720                                                |                 |     |     |     |     | MIC |     |             |     |     |      |  |
| OS87                                                 |                 |     |     |     |     | MIC |     |             |     |     |      |  |
| PU101                                                |                 |     |     |     |     | MIC |     |             |     |     |      |  |
| OUI48                                                |                 |     |     |     |     | MIC |     |             |     |     |      |  |
| PC186                                                |                 |     |     |     |     | MIC |     |             |     |     |      |  |
| OCI94                                                |                 |     |     |     |     | MIC |     |             |     |     |      |  |
| PC313                                                |                 |     |     |     |     | MIC |     |             |     |     |      |  |
| PC240                                                |                 |     |     |     |     |     | MIC |             |     |     |      |  |
| OS91                                                 |                 |     |     |     |     |     | MIC |             |     |     |      |  |
| P815                                                 |                 |     |     |     |     |     | MIC |             |     |     |      |  |
| ATCC13637                                            |                 |     |     |     |     |     | MIC |             |     |     |      |  |
| PC245                                                |                 |     |     |     |     |     |     | MIC         |     |     |      |  |
| OR41                                                 |                 |     |     |     |     |     |     | MIC         |     |     |      |  |
| PU126                                                |                 |     |     |     |     |     |     | MIC         |     |     |      |  |
| 4834-R                                               |                 |     |     |     |     |     |     |             | MIC |     |      |  |
| OCI97                                                |                 |     |     |     |     |     |     |             | MIC |     |      |  |
| OL16                                                 |                 |     |     |     |     |     |     |             | MIC |     |      |  |
| PU109                                                |                 |     |     |     |     |     |     |             | MIC |     |      |  |
| OUI353                                               |                 |     |     |     |     |     |     |             | MIC |     |      |  |
| PC226                                                |                 |     |     |     |     |     |     |             | MIC |     |      |  |
| OUI110                                               |                 |     |     |     |     |     |     |             |     | MIC |      |  |
| PU153                                                |                 |     |     |     |     |     |     |             |     | MIC |      |  |
| OCI323                                               |                 |     |     |     |     |     |     |             |     | MIC |      |  |
| OUI343                                               |                 |     |     |     |     |     |     |             |     | MIC |      |  |
| H5726                                                |                 |     |     |     |     |     |     |             |     |     | MIC→ |  |
| Strains showing homogeneous response to colistin     |                 |     |     |     |     |     |     |             |     |     |      |  |
| S3149                                                |                 |     | MIC |     |     |     |     |             |     |     |      |  |
| OR79                                                 |                 |     |     | MIC |     |     |     |             |     |     |      |  |
| OL11                                                 |                 |     |     |     | MIC |     |     |             |     |     |      |  |
| PU100                                                |                 |     |     |     | MIC |     |     |             |     |     |      |  |
| S289                                                 |                 |     |     |     |     | MIC |     |             |     |     |      |  |
| B5742                                                |                 |     |     |     |     |     | MIC |             |     |     |      |  |
| PU102                                                |                 |     |     |     |     |     | MIC |             |     |     |      |  |
| OG156                                                |                 |     |     |     |     |     |     | MIC         |     |     |      |  |
| PL12                                                 |                 |     |     |     |     |     |     |             |     | MIC |      |  |
| OUI111                                               |                 |     |     |     |     |     |     |             |     |     | MIC  |  |
| OUI52                                                |                 |     |     |     |     |     |     |             |     |     | MIC  |  |
| E77                                                  |                 |     |     |     |     |     |     |             |     |     | MIC→ |  |
| L9-5R5                                               |                 |     |     |     |     |     |     |             |     |     | MIC→ |  |

**Supplementary Figure S1.** Graphical representation of the resazurin-based 96-well plate BMD method for the determination of the minimum inhibitory concentration (MIC) of colistin in a panel of 61 *S. maltophilia* strains. The color changes were observed 30 min after addition of resazurin (pink color indicates growth and blue means inhibition of growth). The purple color in the graph indicates the purple/pink “transition zone”. The MIC was taken as the first well in the microdilution plate exhibiting 80% growth inhibition compared to the absorbance (OD550) of the well without antibiotic (arrows indicate MIC values out of the detection limits). The clinical breakpoint for resistance (2 mg/L) is indicated with a thicker black line.

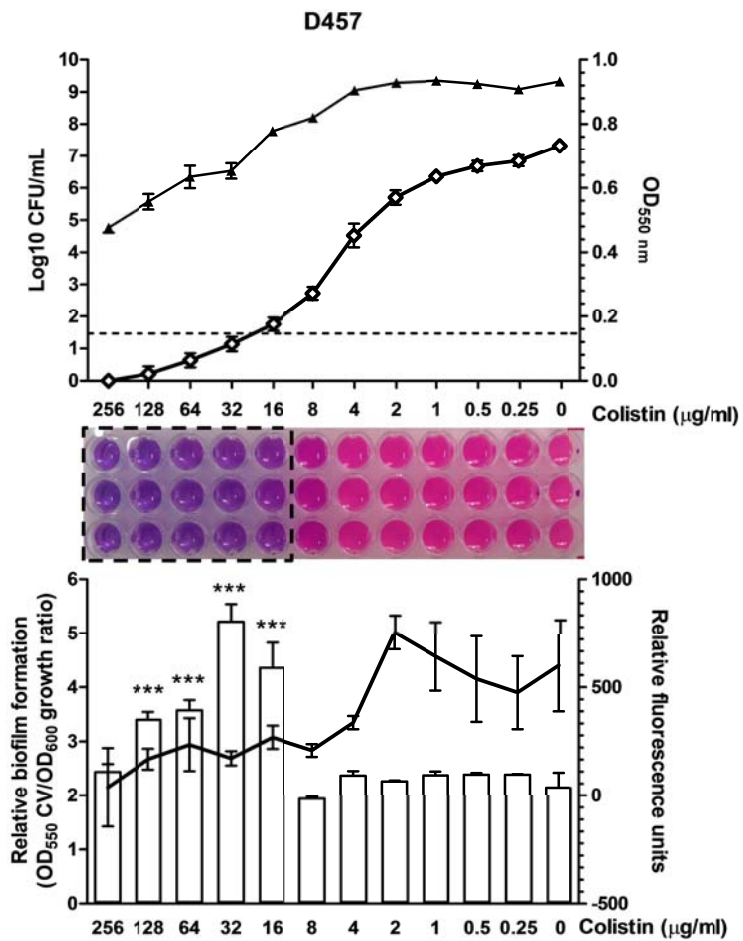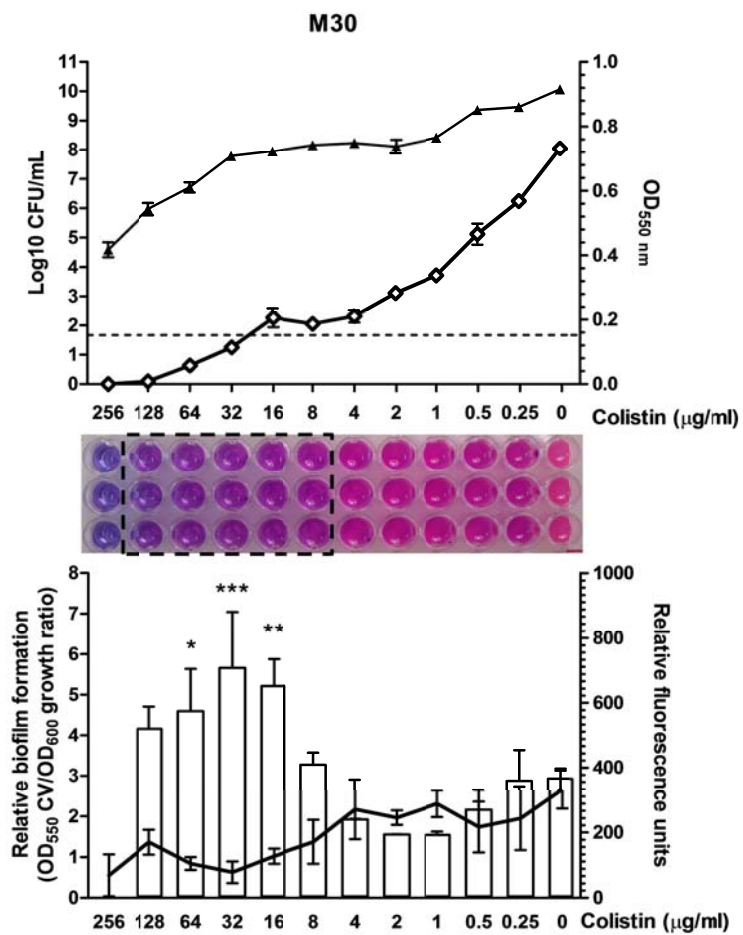

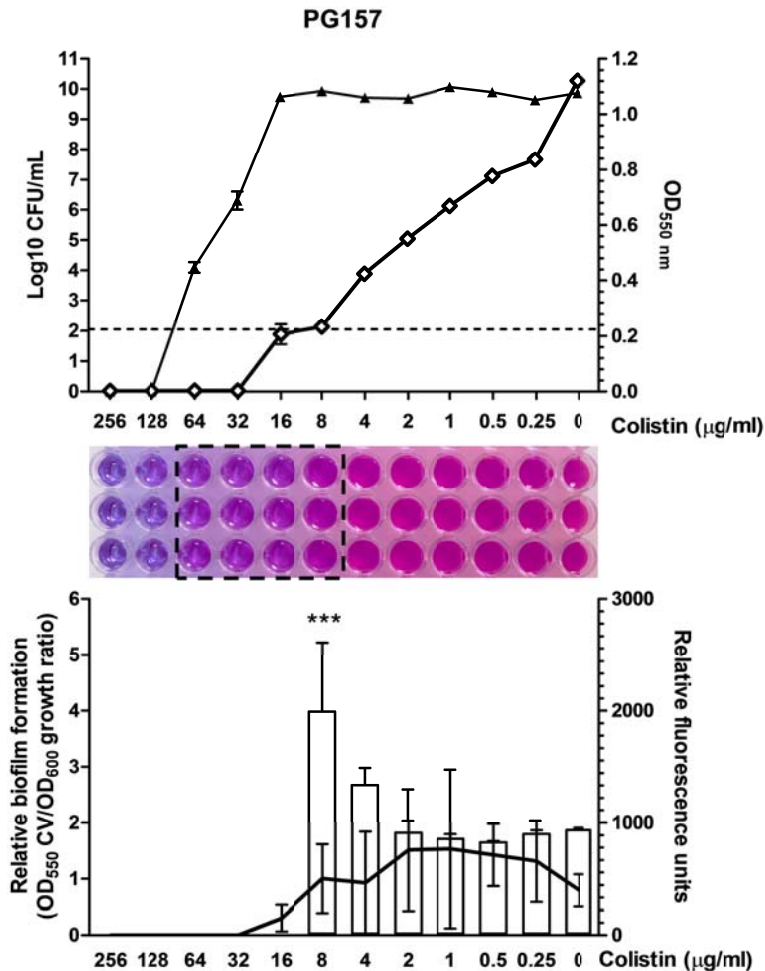

**Supplementary Figure S2:** Uninterpretable results during colistin MIC determination by the BMD method in CAMHB broth for the colistin-resistant clinical strains D457, M30 and PG157 (Upper graphic in each panel). The optical density at 550 nm (white diamond) and CFU/ml (black triangle) of each well in the microtiter plate was measured after 24 hours of incubation at 37°C. Error bars are generated from three replicates. Colistin concentrations are in serial two-fold dilutions starting at 256 mg/L. The colistin MIC was taken as the lowest concentration that inhibited 80% of growth (OD<sub>550</sub>) as compared to the control well without antibiotic (dashed line in the graph). A picture of three replicas of the microdilution wells with the calorimetric indicator resazurin is shown below each graph with the purple/pink transition zone boxed. The lower graphic in each panel shows total biofilm formation relative to bacterial growth in each well of the BMD plate as a bar graph (Y axis on the left) and the viability of the biofilm determined by resazurin staining as a line graph (Y axis on the right). Fluorescence units are expressed as relative to the biofilm formed in each well of the microtiter plate. Error bars are generated from four replicates in each experiment. Statistically significant increases in biofilm formation with respect to untreated control are indicated: \*  $P < 0.05$ , \*\*  $P < 0.01$  and \*\*\*  $P < 0.001$  (one-way ANOVA with Dunnett's multiple comparison test).

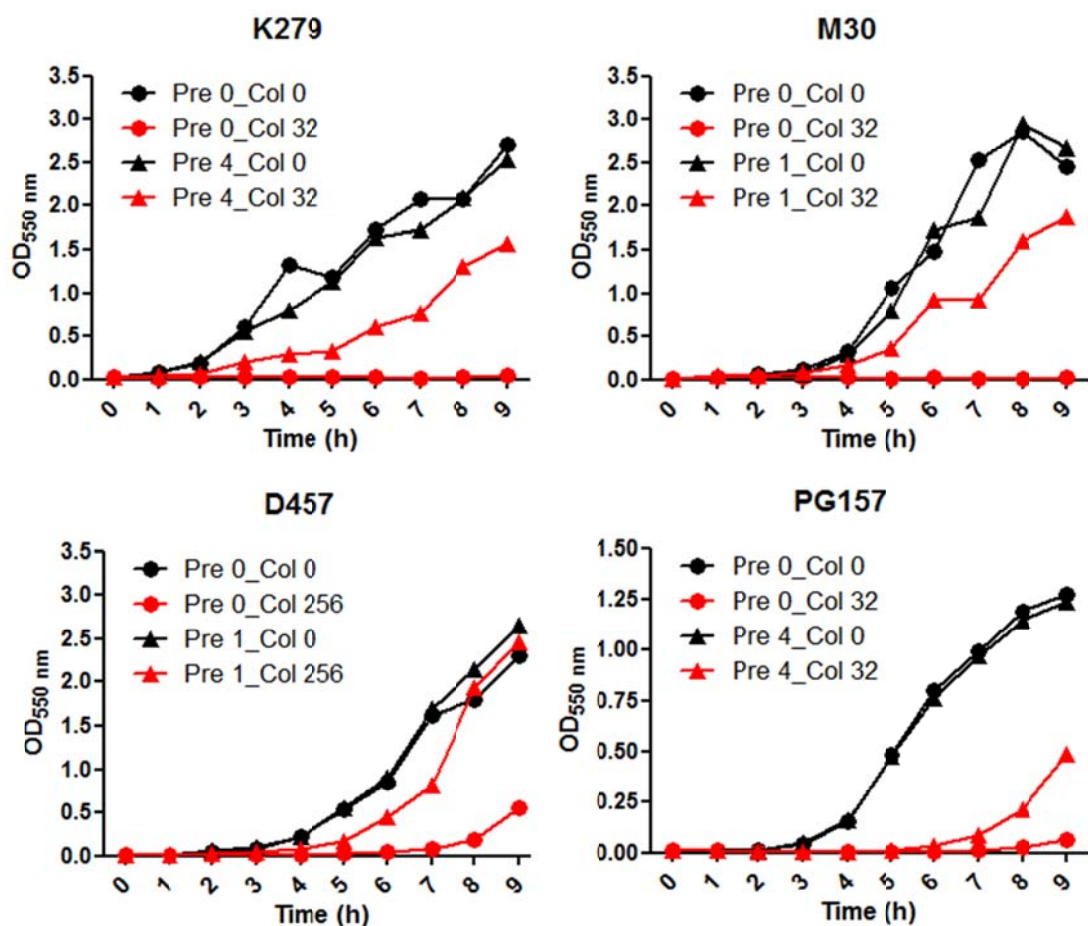

**Supplementary Figure S3:** Adaptive response to colistin in four isolates of *S. maltophilia* showing resistance to colistin by the broth microdilution method. Effect of preincubation with sub-inhibitory concentrations of colistin (Pre in mg/L) on the growth of selected strains in CAMHB supplemented with an inhibitory concentration of colistin (Col in mg/L).
